# Supplementary material for: Leishmaniasis sand fly vector density reduction is less marked in destitute housing after insecticide thermal fogging
Source: PubMed Central journal article supplement (PMC3693930; doi:10.1186/1756-3305-6-164), 2013-06-06
Supplement: 1756-3305-6-164-S4.pdf [file 1756-3305-6-164-S4.pdf]

**Table S1** Selection of the best negative binomial model explaining the abundance of all Phlebotomine Sand Flies in Trinidad de Las Minas, Capira, Panama following two foggings with deltamethrin [6 mg a.i.m<sup>-2</sup>]. Feeding indicates the feeding preference (whether a species has been found feeding mainly on humans or not, habitat (domiciliary or peri-domiciliary), Fogging A (whether a house was fogged or was a control), Fogging B (whether a house was fogged, with different groups for the fogging event, or was a control) and monthly Rainfall (mean daily values, standard deviation of daily rainfall, S.D., and coefficient of variation= S.D. / mean ), \* indicates the interaction between factors. AIC stands for Akaike Information criterion and the minimum value is **bolded**.

| Model Parameters                                                                                | AIC           |
|-------------------------------------------------------------------------------------------------|---------------|
| Feeding*FoggingA + Habitat*Feeding + Rainfall coefficient of variation                          | 954.87        |
| Feeding*FoggingA + Habitat*Feeding + Rainfall(mean)*Rainfall(S.D.)                              | 953.57        |
| Feeding*FoggingA + Habitat*Feeding + 2 <sup>nd</sup> degree polynomial of Rainfall (mean)       | 955.67        |
| <b>Feeding*FoggingA + Habitat*Feeding + 2<sup>nd</sup> degree polynomial of Rainfall (S.D.)</b> | <b>946.40</b> |
| Feeding*FoggingB + Habitat*Feeding + Rainfall coefficient of variation                          | 958.86        |
| Feeding*FoggingB + Habitat*Feeding + Rainfall(mean)*Rainfall(S.D.)                              | 957.27        |
| Feeding*FoggingB + Habitat*Feeding + 2 <sup>nd</sup> degree polynomial of Rainfall (mean)       | 959.08        |
| Feeding*FoggingB + Habitat*Feeding + 2 <sup>nd</sup> degree polynomial of Rainfall (S.D.)       | 949.63        |
