# Supplementary material for: Leishmaniasis sand fly vector density reduction is less marked in destitute housing after insecticide thermal fogging
Source: PubMed Central journal article supplement (PMC3693930; doi:10.1186/1756-3305-6-164), 2013-06-06
Supplement: 1756-3305-6-164-S6.pdf [file 1756-3305-6-164-S6.pdf]

**Table S3** Principal components analysis used to estimate the housing destituteness index. Variable indicates the variables and Comp.1, Comp. 2 and Comp. 3 indicate the loadings associated with each one of the three main principal components. The two bottom rows indicate the proportional variance and cumulative variance of the three main principal components.

| Variable               | Comp.1 | Comp.2 | Comp.3 |
|------------------------|--------|--------|--------|
| Ceiling                | 0.150  | 0.263  | -0.256 |
| Wall Material          | 0.390  | 0      | -0.146 |
| Floor                  | 0.384  | 0.567  | -0.437 |
| Electricity            | 0.282  | 0.552  | 0.653  |
| Crevice                | 0.553  | -0.327 | -0.172 |
| Complete Walls         | 0.188  | 0      | 0.49   |
| Holes in Doors         | 0.507  | -0.44  | 0.162  |
| Proportion of Variance | 0.33   | 0.25   | 0.16   |
| Cumulative Proportion  | 0.33   | 0.58   | 0.74   |
