# Supplementary material for: Leishmaniasis sand fly vector density reduction is less marked in destitute housing after insecticide thermal fogging
Source: PubMed Central journal article supplement (PMC3693930; doi:10.1186/1756-3305-6-164), 2013-06-06
Supplement: 1756-3305-6-164-S8.pdf [file 1756-3305-6-164-S8.pdf]

**Table S4** Principal components analysis used to estimate the peridomicile index. Variable indicates the variables and Comp.1, Comp. 2 and Comp. 3 indicate the loadings associated with each one of the three main principal components. The two bottom rows indicate the proportional variance and cumulative variance of the three main principal components.

| Variable               | Comp.1 | Comp.2 | Comp.3 |
|------------------------|--------|--------|--------|
| Rubbish                | 0.180  | 0.637  | -0.405 |
| Water Bodies           | 0.479  | -0.171 | 0.414  |
| Logs                   | 0.543  | 0.107  | 0.295  |
| Stones                 | 0.567  | 0.178  | -0.334 |
| Palms                  | 0.198  | -0.487 | -0.401 |
| Ornamental             | -0.183 | 0.504  | 0.413  |
| Vegetales              | -0.143 | 0.139  | -0.365 |
| Fruits                 | 0.167  | 0.104  | 0      |
| Proportion of Variance | 0.32   | 0.21   | 0.13   |
| Cumulative Proportion  | 0.32   | 0.53   | 0.66   |
