# Supplementary material for: Leishmaniasis sand fly vector density reduction is less marked in destitute housing after insecticide thermal fogging
Source: PubMed Central journal article supplement (PMC3693930; doi:10.1186/1756-3305-6-164), 2013-06-06
Supplement: 1756-3305-6-164-S10.pdf [file 1756-3305-6-164-S10.pdf]

**Table S5** Principal components analysis used to estimate the vegetation structure index. Variable indicates the variables and Comp.1, Comp. 2 and Comp. 3 indicate the loadings associated with each one of the three main principal components. The two bottom rows indicate the proportional variance and cumulative variance of the three main principal components.

| Variable               | Comp.1 | Comp.2 | Comp.3 |
|------------------------|--------|--------|--------|
| Canopy Cover           | 0.625  | 0      | -0.258 |
| Canopy Height          | 0.400  | -0.611 | -0.152 |
| Ground Cover           | -0.337 | -0.181 | -0.558 |
| Bush Cover             | 0.205  | 0.424  | -0.7   |
| Shade                  | 0.531  | 0      | 0.308  |
| Proportion of Variance | 0.34   | 0.22   | 0.17   |
| Cumulative Proportion  | 0.34   | 0.56   | 0.73   |
