# Supplementary material for: Leishmaniasis sand fly vector density reduction is less marked in destitute housing after insecticide thermal fogging
Source: PubMed Central journal article supplement (PMC3693930; doi:10.1186/1756-3305-6-164), 2013-06-06
Supplement: 1756-3305-6-164-S12.pdf [file 1756-3305-6-164-S12.pdf]

**Table S6** Principal components analysis used to estimate the animal abundance indices. Variable indicates the variables and Comp.1, Comp. 2 and Comp. 3 indicate the loadings associated with each one of the three main principal components. The two bottom rows indicate the proportional variance and cumulative variance of the three main principal components.

| Index            | Animals                | Comp.1 | Comp.2 | Comp.3 |
|------------------|------------------------|--------|--------|--------|
| Wild Animals     | Opossums               | 0.374  | 0      | 0.297  |
|                  | Squirrels              | 0.227  | 0      | -0.168 |
|                  | Voles                  | 0.412  | -0.555 | -0.19  |
|                  | Monkeys                | 0.463  | 0      | -0.187 |
|                  | Birds                  | 0.322  | -0.381 | 0.426  |
|                  | Sloths                 | 0.473  | 0.612  | -0.137 |
|                  | Porcupines             | 0      | 0      | -0.732 |
|                  | Bats                   | 0.299  | 0.394  | 0.278  |
|                  | Proportion of Variance | 0.41   | 0.18   | 0.13   |
|                  | Cumulative Proportion  | 0.41   | 0.59   | 0.72   |
| Domestic Animals | Chickens               | 0.477  | 0.671  | -0.153 |
|                  | Dogs                   | 0.18   | 0      | 0      |
|                  | Cats                   | 0.535  | -0.556 | -0.618 |
|                  | Horses                 | 0      | 0.485  | -0.4   |
|                  | Parrots                | 0.672  | 0      | 0.654  |
|                  | Proportion of Variance | 0.36   | 0.26   | 0.19   |
|                  | Cumulative Proportion  | 0.36   | 0.62   | 0.81   |

| Index                     | Animals                | Comp.1 | Comp.2 | Comp.3 |
|---------------------------|------------------------|--------|--------|--------|
| Domestic and Wild animals | Opossums               | 0.334  | 0      | 0      |
|                           | Squirrels              | 0.203  | 0      | 0      |
|                           | Voles                  | 0.395  | 0      | -0.438 |
|                           | Monkeys                | 0.448  | 0      | -0.132 |
|                           | Birds                  | 0.292  | 0      | -0.222 |
|                           | Sloths                 | 0.431  | 0.23   | 0.528  |
|                           | Porcupines             | 0.104  | 0.301  | 0      |
|                           | Bats                   | 0.293  | -0.262 | 0.411  |
|                           | Chickens               | 0.141  | -0.258 | 0      |
|                           | Dogs                   | 0.158  | -0.165 | 0.146  |
|                           | Cats                   | 0      | -0.553 | 0.387  |
|                           | Horses                 | 0.253  | 0.109  | 0      |
|                           | Parrots                | 0      | -0.606 | -0.329 |
|                           | Proportion of Variance | 0.28   | 0.16   | 0.14   |
| Cumulative Proportion     | 0.28                   | 0.45   | 0.58   |        |
