# Supplementary material for: Leishmaniasis sand fly vector density reduction is less marked in destitute housing after insecticide thermal fogging
Source: PubMed Central journal article supplement (PMC3693930; doi:10.1186/1756-3305-6-164), 2013-06-06
Supplement: 1756-3305-6-164-S13.pdf [file 1756-3305-6-164-S13.pdf]

**Table S7** Model selection for the best negative binomial model explaining post-fogging sand fly abundance in the houses. Parameters included an index for housing destituteness (Housing Destituteness), whether a house was fogged or not (Fogging). \* indicates the interaction between factors. AIC stands for Akaike Information criterion and the minimum value for each sand fly species is **bolded**.

| Model Parameters                                               | AIC           |
|----------------------------------------------------------------|---------------|
| Housing Destituteness * Fogging * Peridomicile index           | 284.31        |
| Housing Destituteness * Fogging + Fogging * Peridomicile index | 289.34        |
| Housing Destituteness + Fogging + Peridomicile index           | 291.92        |
| Housing Destituteness * Fogging                                | 292.82        |
| Housing Destituteness + Fogging                                | 290.82        |
| Peridomicile Index * Fogging                                   | 289.50        |
| Peridomicile Index + Fogging                                   | 290.97        |
| Peridomicile Index * Housing Destituteness                     | 288.64        |
| Peridomicile Index + Housing Destituteness                     | 290.25        |
| (Housing Destituteness) <sup>2</sup>                           | 285.62        |
| <b>Housing Destituteness with 1 breakpoint</b>                 | <b>278.29</b> |
| Housing Destituteness                                          | 288.82        |
| (Peridomicile Index) <sup>2</sup>                              | 291.98        |
| Peridomicile Index with 1 breakpoint                           | 290.49        |
| Peridomicile Index                                             | 290.49        |
| (Wild animal Index) <sup>2</sup>                               | 291.85        |
| Wild animal Index with 1 breakpoint                            | 286.41        |
| Wild animal Index                                              | 293.13        |
| (Wild and domestic animal Index) <sup>2</sup>                  | 288.70        |
| Wild and domestic animal with 1 breakpoint                     | 283.99        |
| Wild and domestic animal                                       | 291.52        |
| (Wild animal species richness) <sup>2</sup>                    | 289.83        |
| Wild animal species richness with 1 breakpoint                 | 291.26        |
| Wild animal species richness                                   | 292.66        |
